# Supplementary material for: The clinical and molecular diversity of mast cell leukemia with or without associated hematologic neoplasm
Source: PubMed Central journal article supplement — Haematologica. 2017 Jun;102(6):1035–43. doi: 10.3324/haematol.2017.163964 (PMC5451335; doi:10.3324/haematol.2017.163964), 2017-06
Supplement: 2017_163964-Disclosures_and_Contributions.pdf [file 2017_163964-Disclosures_and_Contributions.pdf]

Haematologica  
HAEMATOL/2017/163964  
Version 3

The clinical and molecular diversity of mast cell leukemia with or  
without associated hematologic neoplasm

Mohamad Jawhar, Juliana Schwaab, Manja Meggendorfer, Nicole  
Naumann, Hans-Peter Horny, Karl Sotlar, Torsten Haferlach, Karla  
Schmitt, Alice Fabarius, Peter Valent, Wolf-Karsten Hofmann, Nicholas  
C.P. Cross, Georgia Metzgeroth, and Andreas Reiter

Disclosures: H-PH, KS, PV, and AR served as consultants in a global phase-II-study examining the effects of midostaurin in advanced systemic mastocytosis. H-PH, KS, KLS, PV, NCPC and AR received honoraria and/or travel support from Novartis Pharmaceuticals. MJ and JS received travel support from Novartis Pharmaceuticals. TH has equity ownership of the MLL Munich Leukemia Laboratory. MM is employed by the MLL Munich Leukemia Laboratory. The remaining authors declare no competing financial interests.

Contributions: MJ, JS, MM, NN, TH, AF, NCPC, AR performed the laboratory work for the study. MJ, JS, KLS, GM and AR provided patient material and information. HPH and KS reviewed the bone marrow biopsies. MJ, JS, MM, NN, TH, AF, PV, WKH, NCPC, GM and AR wrote the paper.
